# Supplementary material for: Study of ITO-free roll-to-roll compatible polymer solar cells using the one-step doctor blading technique
Source: Royal Society of Chemistry journal article supplement (doi:10.1039/c6ta10018j), 2017-01-01
Supplement: c6ta10018j1.pdf [file c6ta10018j1.pdf]

## Supporting Information for:

### Study of ITO-free roll-to-roll compatible polymer solar cells using the one-step doctor blading technique

Yuanbao Lin,<sup>a</sup> Chaosheng Cai,<sup>a</sup> Yangdong Zhang,<sup>a</sup> Wenhao Zheng,<sup>a</sup>

Junyu Yang,<sup>a</sup> Ergang Wang,<sup>b</sup> Lintao Hou<sup>a,\*</sup>

<sup>a</sup>Siyuan Laboratory, Guangzhou Key Laboratory of Vacuum Coating Technologies and New Energy Materials, Key Laboratory of Optoelectronic Information and Sensing Technologies of Guangdong Higher Education Institutes, Department of Physics, Jinan University, Guangzhou 510632, PR China, \*Email: thlt@jnu.edu.cn

<sup>b</sup>Department of Chemistry and Chemical Engineering, Chalmers University of Technology, SE-412 96, Göteborg, Sweden

**Table S1** Photovoltaic parameters of Type I and Type II devices with various substrate temperatures (25, 40, 50, 60 and 70 °C) by doctor blading and spin coating at room temperature under illumination of AM 1.5G (100 mW/cm<sup>2</sup>). Over 20 devices were tested for each averaged value<sup>a</sup>.

| Type   | Fabrication condition   | $J_{sc}$ (mA/cm <sup>2</sup> ) | $V_{oc}$ (V) | FF   | Thickness (nm) | PCE <sub>max</sub> [PCE <sub>ave</sub> ] (%) |
|--------|-------------------------|--------------------------------|--------------|------|----------------|----------------------------------------------|
| Type I | Doctor-blading<br>25 °C | 14.61                          | 0.78         | 0.59 | 115            | 6.56 [6.40]                                  |
| Type I | Doctor-blading<br>40 °C | 13.78                          | 0.77         | 0.59 | 110            | 6.32 [6.19]                                  |
| Type I | Doctor-blading<br>50 °C | 13.54                          | 0.77         | 0.59 | 110            | 6.12 [6.01]                                  |
| Type I | Doctor-blading<br>60 °C | 12.80                          | 0.79         | 0.59 | 105            | 5.94 [5.82]                                  |
| Type I | Doctor-blading<br>70 °C | 12.29                          | 0.76         | 0.54 | 65             | 5.15 [5.02]                                  |
| Type I | Spin coating<br>25 °C   | 15.35                          | 0.78         | 0.62 | 90             | 7.36 [7.24]                                  |

---

|         |                         |       |      |      |     |             |
|---------|-------------------------|-------|------|------|-----|-------------|
| Type II | Doctor-blading<br>25 °C | 14.77 | 0.78 | 0.58 | 110 | 6.62 [6.44] |
| Type II | Doctor-blading<br>40 °C | 14.22 | 0.77 | 0.62 | 110 | 6.83 [6.68] |
| Type II | Doctor-blading<br>50 °C | 14.25 | 0.77 | 0.62 | 105 | 6.92 [6.77] |
| Type II | Doctor-blading<br>60 °C | 14.96 | 0.78 | 0.61 | 100 | 7.11 [7.03] |
| Type II | Doctor-blading<br>70 °C | 14.02 | 0.76 | 0.52 | 65  | 5.65 [5.52] |
| Type II | Spin coating<br>25 °C   | 15.80 | 0.78 | 0.61 | 95  | 7.65 [7.55] |

---

<sup>a</sup> PCE<sub>max</sub>: maximum power conversion efficiency; PCE<sub>ave</sub>: average power conversion efficiency.

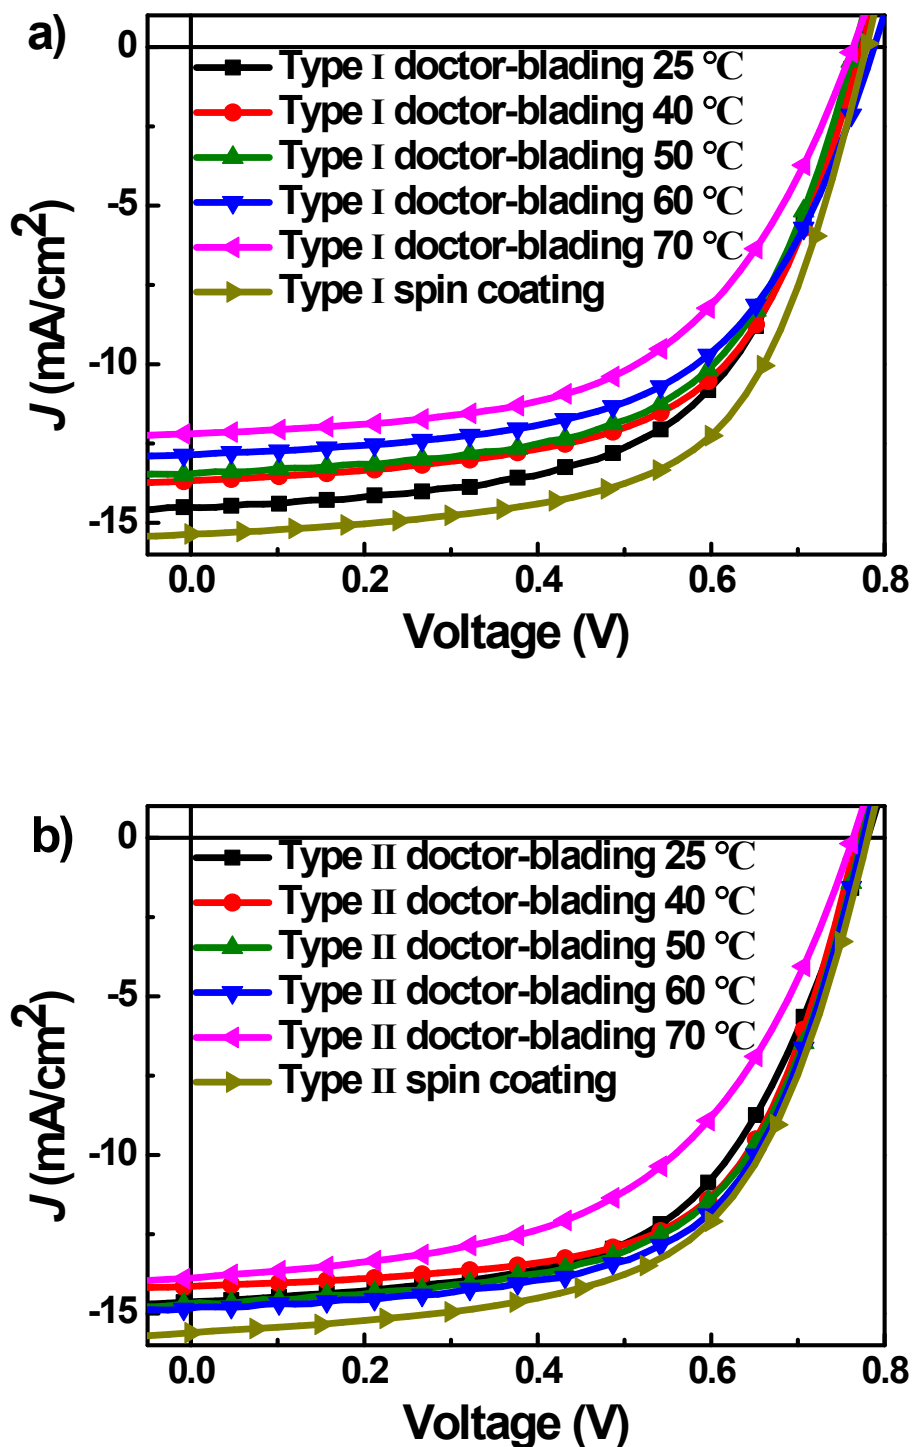

**Fig. S1** *J-V* curves of a) Type I and b) Type II devices with various substrate temperatures (25, 40, 50, 60 and 70 °C) by doctor blading and by spin coating at room temperature.

## Owens Method

This method is used to calculate the solid surface energy and is based on the following model :

$$\gamma_s = \gamma_s^D + \gamma_s^P, \gamma_l = \gamma_l^D + \gamma_l^P.$$

where  $\gamma_s$  is the surface energy of the solid, which is composed of the dispersion force  $\gamma_s^D$  and polarity force  $\gamma_s^P$ . Similarly,  $\gamma_l$  is the surface energy of the liquid and consists of a dispersion force  $\gamma_l^D$  and polarity force  $\gamma_l^P$ . Then,

$$\gamma_l(1 + \cos\theta) = 2(\gamma_s^D \gamma_l^D)^{1/2} + 2(\gamma_s^P \gamma_l^P)^{1/2}.$$

If the surface energies  $\gamma_l^D$  and  $\gamma_l^P$  of the testing liquid are known and its contact angle on solid surface is measured, there are still two unknown quantities ( $\gamma_s^D, \gamma_s^P$ ) remaining in the formula. Therefore, to determine  $\gamma_s^D$  and  $\gamma_s^P$ , two known testing liquids are required.

$$\gamma_{l1}(1 + \cos\theta_1) = 2(\gamma_s^D \gamma_{l1}^D)^{1/2} + 2(\gamma_s^P \gamma_{l1}^P)^{1/2}.$$

$$\gamma_{l2}(1 + \cos\theta_2) = 2(\gamma_s^D \gamma_{l2}^D)^{1/2} + 2(\gamma_s^P \gamma_{l2}^P)^{1/2}.$$

After obtaining  $\gamma_s^D$  and  $\gamma_s^P$ ,  $\gamma_s$  is determined using  $\gamma_s = \gamma_s^D + \gamma_s^P$ .

**Table S2** Parameters of the testing liquids used in the surface energy measurement.

| Liquid    | Polar force<br>( $\gamma_l^P$ ) | Dispersion force<br>( $\gamma_l^D$ ) | Surface energy<br>( $\gamma_l$ ) | $\gamma_l^P/\gamma_l^D$ |
|-----------|---------------------------------|--------------------------------------|----------------------------------|-------------------------|
| Water     | 51                              | 21.8                                 | 72.8                             | 2.36                    |
| Formamide | 18.7                            | 39.5                                 | 58.2                             | 0.47                    |

**Table S3** Contact angles of water and formamide on various materials films, which were converted into the surface energy values based on Owens method.

| Solid surface                   | Water<br>contact angle | Formamide<br>contact angle | Solid surface energy<br>(mN/m) |
|---------------------------------|------------------------|----------------------------|--------------------------------|
| Al/TiOx                         | 61°                    | 70°                        | 43.9                           |
| PFN                             | 55°                    | 65°                        | 49.3                           |
| BHJ                             | 94°                    | 80°                        | 20.2                           |
| PFN:BHJ<br>spin coating         | 94°                    | 80°                        | 20.2                           |
| PFN:BHJ<br>doctor blading 25 °C | 95°                    | 80°                        | 20.4                           |
| PFN:BHJ<br>doctor blading 60 °C | 92°                    | 75°                        | 23.6                           |

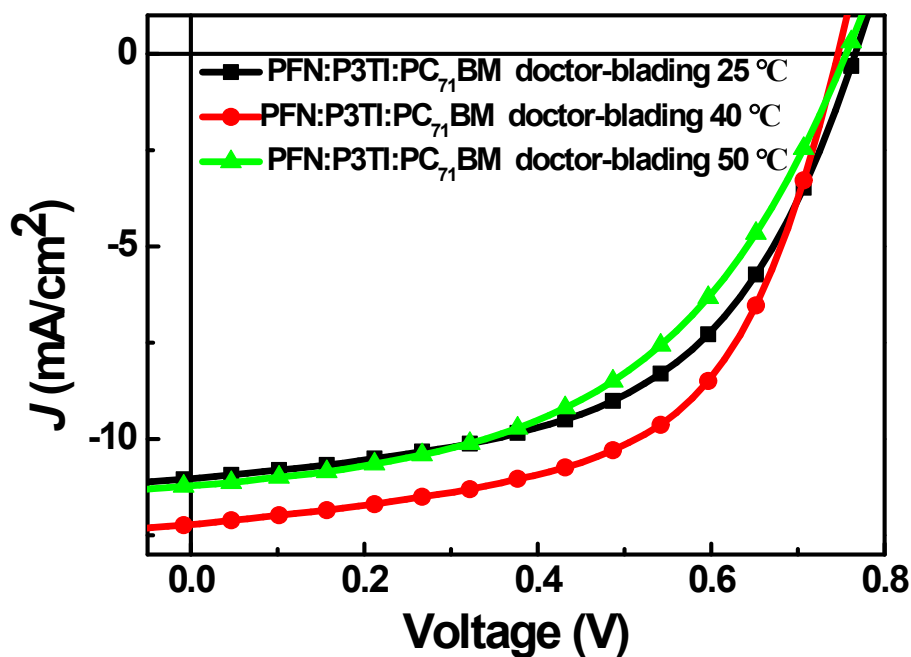

**Fig. S2** *J*-*V* curves of PFN:P3TI:PC<sub>71</sub>BM devices with various doctor-blading substrate temperature (25, 40 and 60 °C).

**Table S4** Photovoltaic parameters of PFN:P3TI:PC<sub>71</sub>BM devices with various doctor-blading substrate temperatures (25, 40 and 60 °C) under illumination of AM 1.5G (100 mW/cm<sup>2</sup>). Over 20 devices were tested for each averaged value<sup>a</sup>.

| Active layer                          | Fabrication             | $J_{sc}$<br>(mA/cm <sup>2</sup> ) | $V_{oc}$<br>(V) | FF   | Thickness<br>(nm) | PCE <sub>max</sub><br>[PCE <sub>ave</sub> ] (%) |
|---------------------------------------|-------------------------|-----------------------------------|-----------------|------|-------------------|-------------------------------------------------|
| 3wt% PFN:<br>P3TI:PC <sub>71</sub> BM | Doctor-blading<br>25 °C | 11.29                             | 0.76            | 0.50 | 120               | 4.47 [4.25]                                     |
|                                       | Doctor-blading<br>40 °C | 12.41                             | 0.75            | 0.56 | 111               | 4.74 [4.55]                                     |
|                                       | Doctor-blading<br>60 °C | 11.39                             | 0.76            | 0.49 | 99                | 3.77 [3.58]                                     |

<sup>a</sup> PCE<sub>max</sub>: maximum power conversion efficiency; PCE<sub>ave</sub>: average power conversion efficiency.
